# Supplementary material
Source: MDPI journal article supplement (https://www.mdpi.com/2073-4441/9/10/788)
Supplement: s1 [file s1]

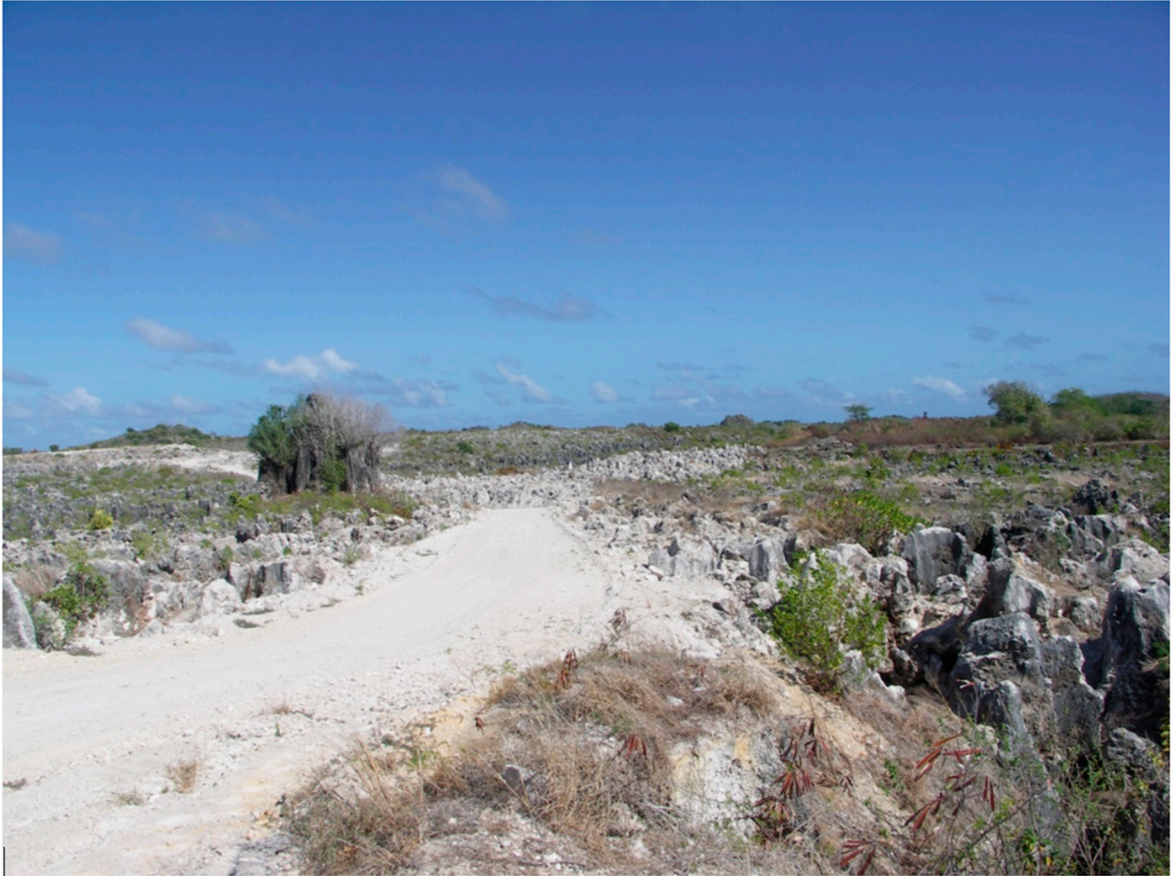

Figure S1: Nauru Topside—landscape, 2010

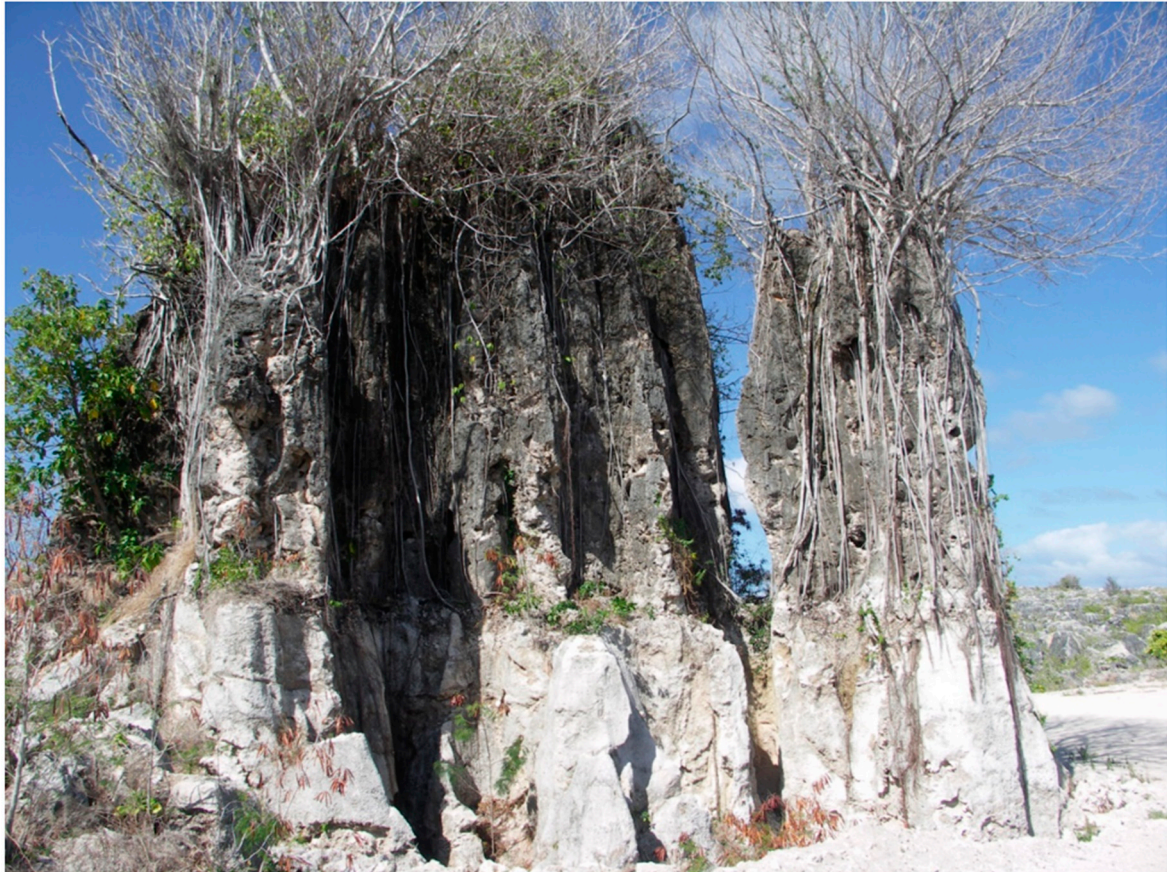

Figure S2: Nauru Topside—Scattered limestone outcrops (or pinnacles), 2010

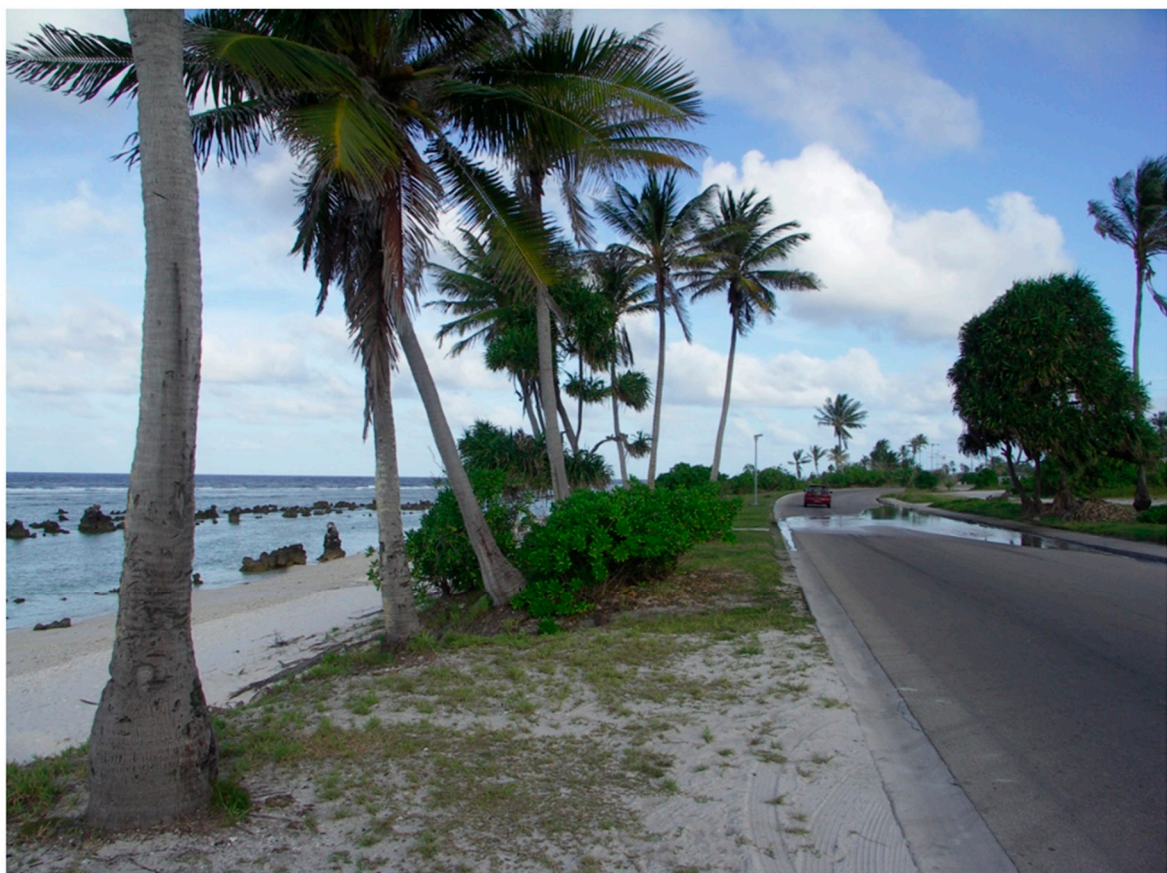

Figure S3: Nauru Bottomside, 2010

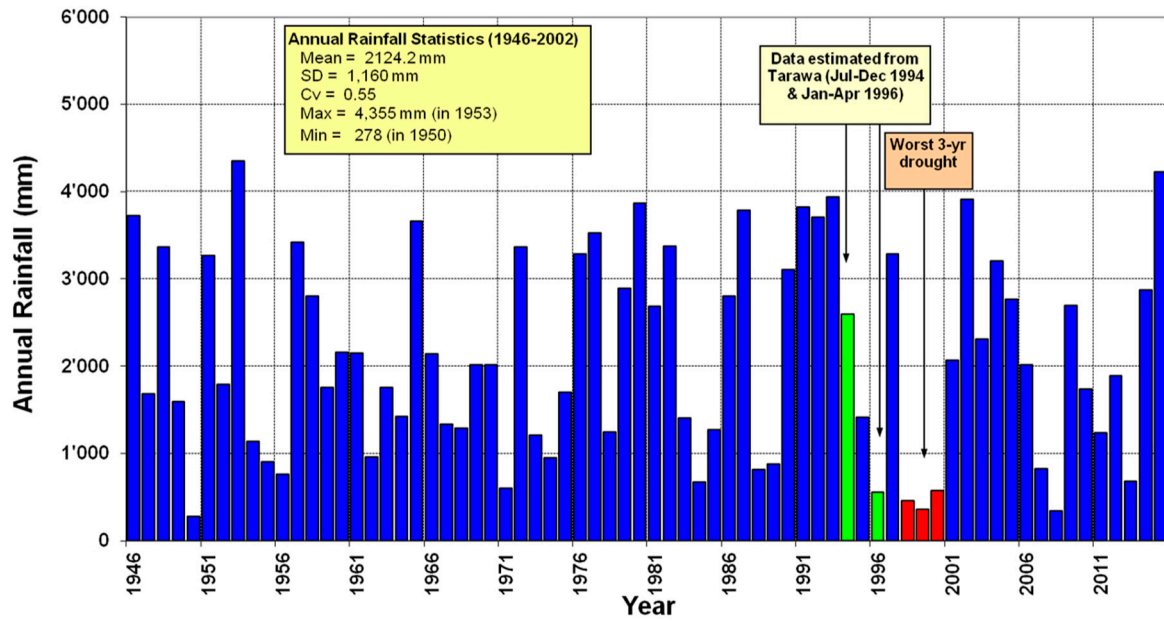

Figure S4: Annual rainfall in Nauru from 1946 to 2015 (data from Nauru Government and Australian Bureau of Meteorology [46])

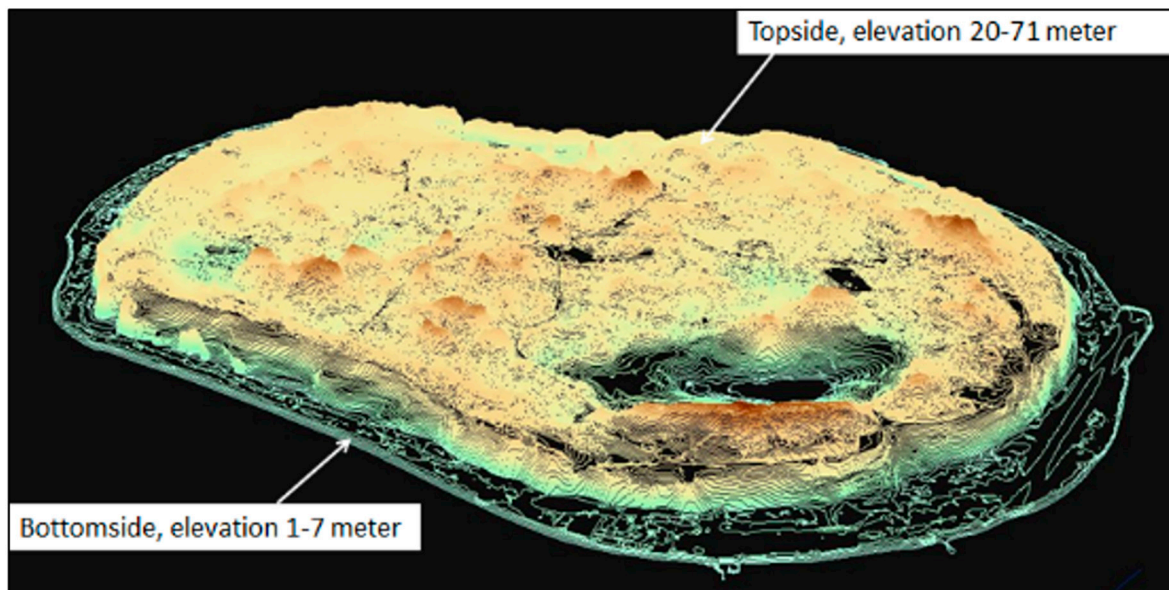

Figure S5: 3D visualization of the DTM elaborated by Politecnico di Milano with the data of the photogrammetric aerial survey carried out in 2010

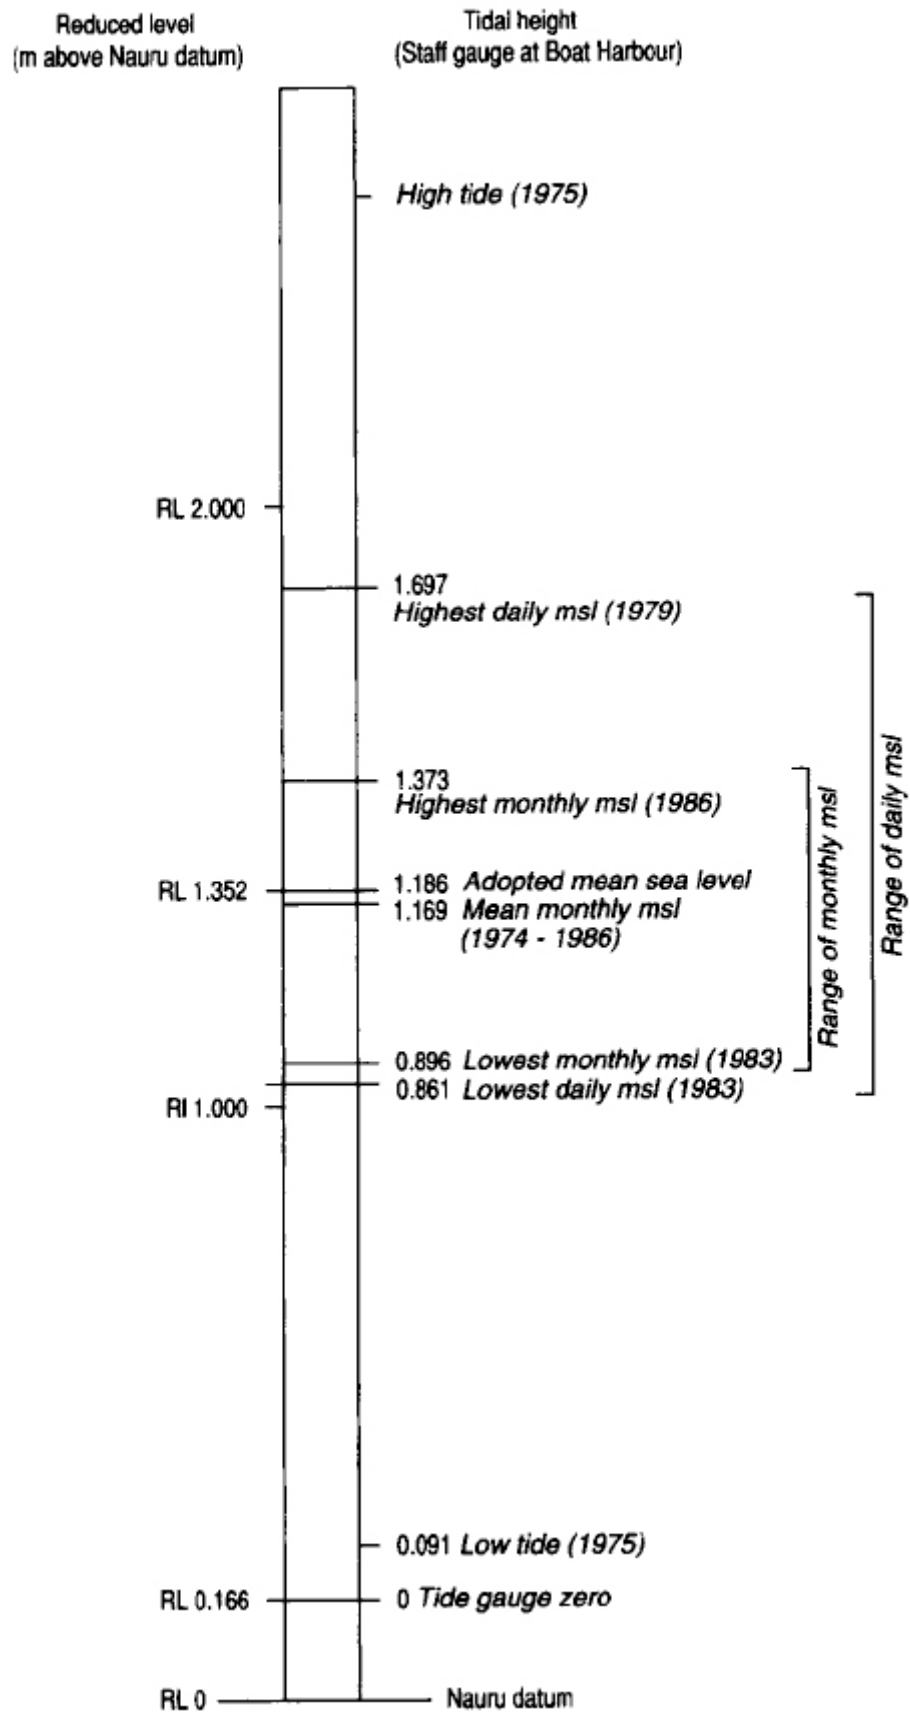

Figure S6: Mean sea level and relationship between Reduced Level (or Nauru Datum) and tidal height (by Jacobson et al. [26])

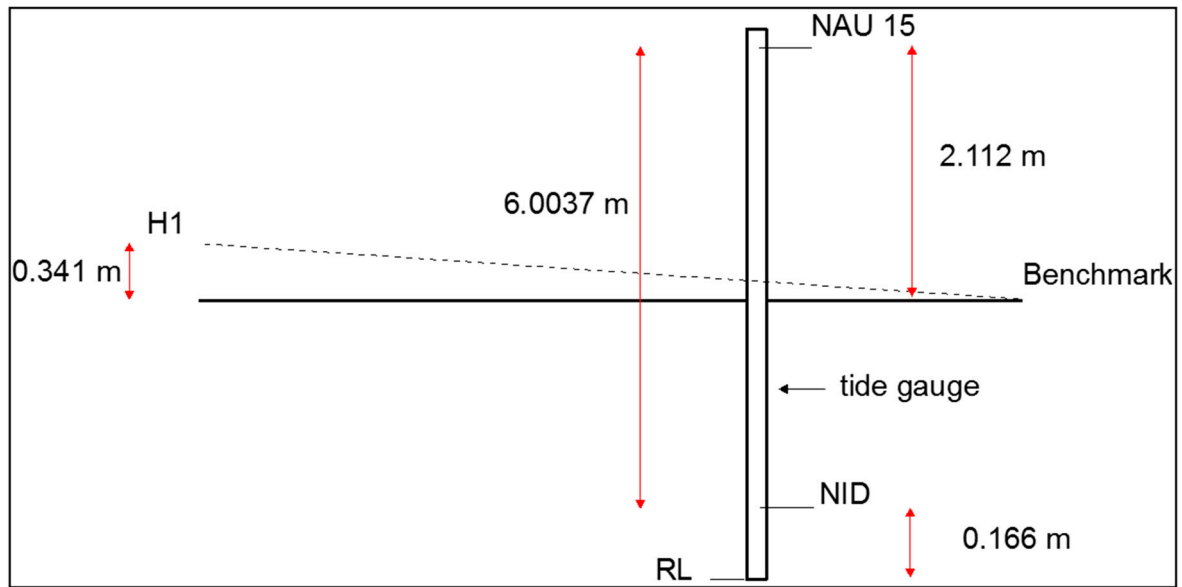

Figure S7: Pattern of the leveling operations in order to obtain the orthometric elevation of RL from H1. The Australian Bureau of Meteorology uses the Nauru Island Datum (NID) as reference level for the tide measurement

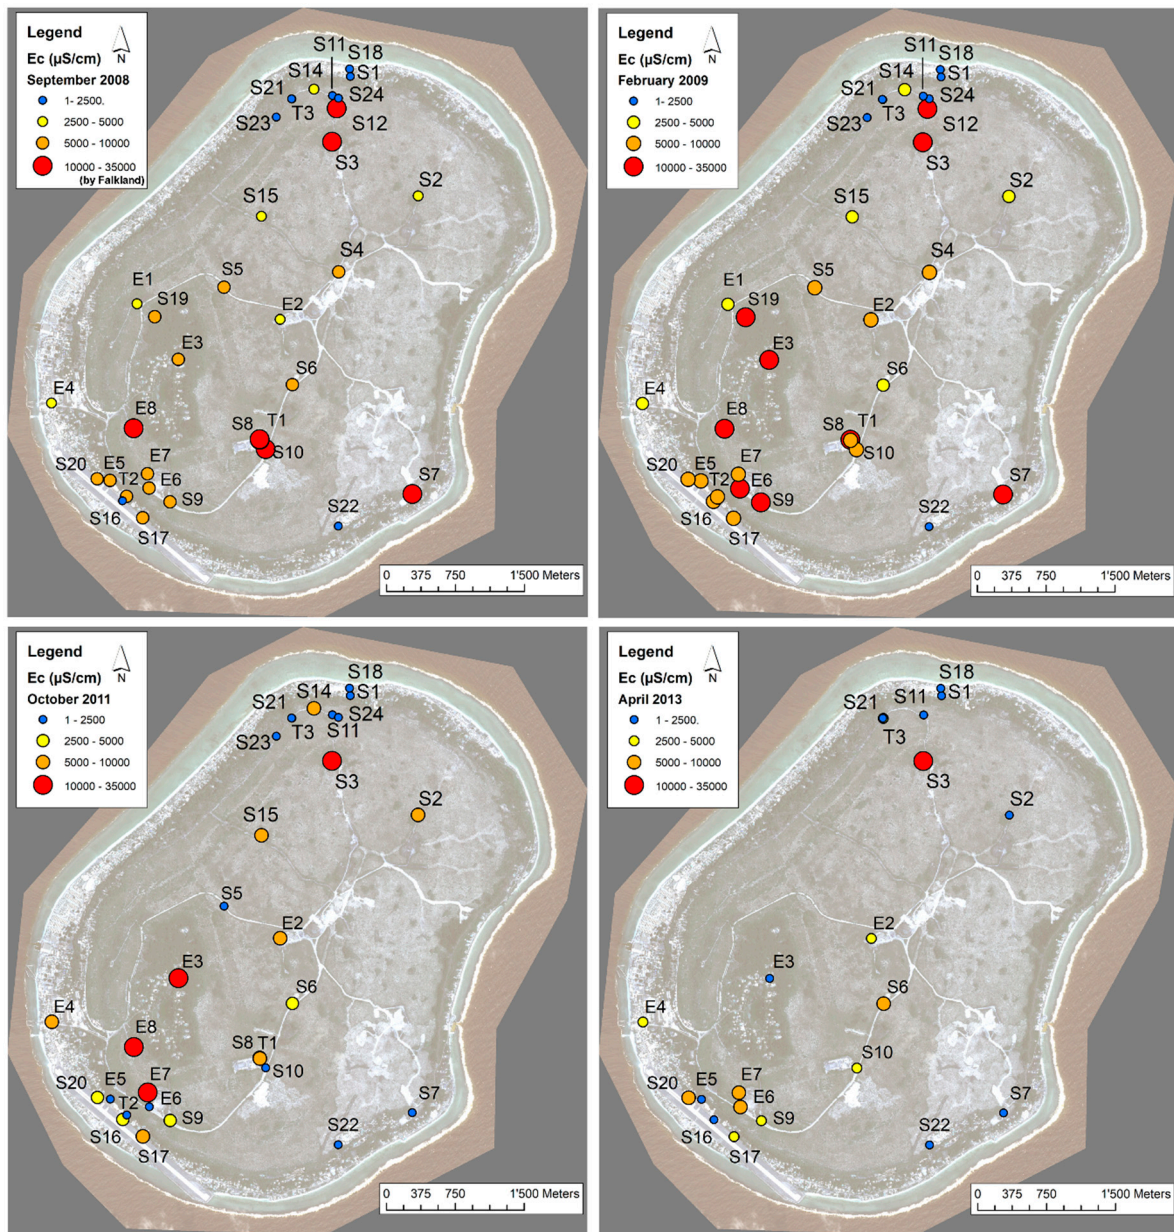

Figure S8: Salt concentration evolution into the Nauru aquifer from 2008 to 2013 at the water table

Table S1: Coordinates of the points directly observed through GNSS receiver. RL stays for the elevation measured above the Reduced Level. Annex 1: Monographs of the surveyed monitoring wells

| ID    | Geographic coordinates (WGS84)<br>[degrees] |                  | Projected coordinates<br>(UTM 58 South) [m] |            | Elevation coordinates [m] |             |        |
|-------|---------------------------------------------|------------------|---------------------------------------------|------------|---------------------------|-------------|--------|
|       | Latitude (S)                                | Longitude (E)    | North (m)                                   | East (m)   | Ellipsoidal               | Orthometric | RL     |
| An2   | 0°30'21.20992"                              | 166°57'1.9413"   | 9944051.124                                 | 717079.996 | 45.701                    | 8.158       | 6.154  |
| Anib1 | 0°31'42.10627"                              | 166°57'6.41386"  | 9941565.885                                 | 717217.543 | 43.416                    | 5.885       | 3.881  |
| At1   | 0°30'16.45443"                              | 166°56'49.62572" | 9944197.330                                 | 716699.161 | 45.590                    | 8.040       | 6.035  |
| Bai1  | 0°30'30.74912"                              | 166°55'44.70325" | 9943758.791                                 | 714691.207 | 47.789                    | 10.204      | 8.200  |
| Den1  | 0°31'10.13081"                              | 166°55'3.87024"  | 9942549.356                                 | 713428.096 | 47.143                    | 9.538       | 7.534  |
| E2    | 0°31'41.28449"                              | 166°56'0.77648"  | 9941591.766                                 | 715187.575 | 72.452                    | 34.883      | 32.878 |
| E4    | 0°32'10.82451"                              | 166°54'40.41275" | 9940685.065                                 | 712702.033 | 47.952                    | 10.339      | 8.334  |
| E5    | 0°32'38.04413"                              | 166°55'1.02844"  | 9939848.675                                 | 713339.316 | 45.813                    | 8.215       | 6.210  |
| E6    | 0°32'40.75531"                              | 166°55'14.75731" | 9939765.314                                 | 713763.868 | 77.465                    | 39.876      | 37.872 |
| E7    | 0°32'35.73763"                              | 166°55'14.1633"  | 9939919.402                                 | 713745.547 | 77.963                    | 40.373      | 38.369 |
| E8    | 0°32'19.68781"                              | 166°55'9.25267"  | 9940412.503                                 | 713593.845 | 72.713                    | 35.118      | 33.113 |
| FIX1  | 0°32'26.1357"                               | 166°55'50.3579"  | 9940214.020                                 | 714864.997 | 66.342                    | 28.772      | 26.767 |
| H1    | 0°31'45.14407"                              | 166°54'34.62653" | 9941474.023                                 | 712523.333 | 44.019                    | 6.400       | 4.395  |
| Ijw1  | 0°31'17.72049"                              | 166°57'26.86112" | 9942314.838                                 | 717850.141 | 46.052                    | 8.529       | 6.524  |
| LP1   | 0°32'5.84037"                               | 166°55'22.95775" | 9940837.766                                 | 714017.813 | 42.805                    | 5.217       | 3.212  |
| S10   | 0°32'27.04516"                              | 166°55'55.72073" | 9940186.028                                 | 715030.831 | 69.022                    | 31.455      | 29.451 |
| S11   | 0°30'22.36840"                              | 166°56'19.15440" | 9944015.932                                 | 715756.733 | 76.279                    | 38.713      | 36.708 |
| S12   | 0°30'26.86694"                              | 166°56'20.69055" | 9943877.720                                 | 715804.198 | 71.195                    | 33.630      | 31.625 |
| S14   | 0°30'20.09586"                              | 166°56'12.69586" | 9944085.805                                 | 715557.019 | 74.631                    | 37.061      | 35.057 |
| S15   | 0°31'4.91976"                               | 166°55'51.25903" | 9942708.995                                 | 714983.641 | 69.528                    | 31.950      | 29.945 |
| S16   | 0°32'45.23902"                              | 166°55'5.40976"  | 9939627.604                                 | 713474.748 | 45.525                    | 7.931       | 5.927  |
| S17   | 0°32'51.24457"                              | 166°55'12.47321" | 9939443.043                                 | 713693.124 | 45.390                    | 7.801       | 5.797  |
| S18   | 0°30'12.96168"                              | 166°56'25.15734" | 9944304.855                                 | 715942.467 | 45.431                    | 7.867       | 5.862  |
| S2    | 0°30'57.73695"                              | 166°56'49.34856" | 9942929.106                                 | 716690.204 | 76.397                    | 38.851      | 36.846 |
| S20   | 0°32'37.53354"                              | 166°54'56.4738"  | 9939864.405                                 | 713198.474 | 45.455                    | 7.855       | 5.850  |
| S22   | 0°32'54.13396"                              | 166°56'21.27783" | 9939353.594                                 | 715820.945 | 73.840                    | 36.292      | 34.288 |
| S23   | 0°30'29.95214"                              | 166°55'59.44608" | 9943783.138                                 | 715147.162 | 74.768                    | 37.191      | 35.187 |
| S3    | 0°30'38.63239"                              | 166°56'19.02853" | 9943516.295                                 | 715752.608 | 53.203                    | 15.638      | 13.634 |
| S4    | 0°31'24.53559"                              | 166°56'21.36181" | 9942106.102                                 | 715824.422 | 70.310                    | 32.751      | 30.747 |
| S5    | 0°31'29.91931"                              | 166°55'41.02453" | 9941941.097                                 | 714576.916 | 67.364                    | 29.783      | 27.778 |
| S6    | 0°32'4.32076"                               | 166°56'5.10543"  | 9940884.040                                 | 715321.288 | 71.057                    | 33.493      | 31.488 |
| S7    | 0°32'42.81182"                              | 166°56'47.33099" | 9939701.156                                 | 716626.785 | 57.969                    | 20.435      | 18.430 |
| S8    | 0°32'23.77374"                              | 166°55'53.68651" | 9940286.548                                 | 714967.959 | 66.647                    | 29.079      | 27.074 |
| S9    | 0°32'45.65564"                              | 166°55'22.13206" | 9939614.640                                 | 713991.897 | 74.402                    | 36.818      | 34.814 |
| T2    | 0°32'43.71972"                              | 166°55'6.82156"  | 9939674.263                                 | 713518.417 | 45.679                    | 8.085       | 6.080  |
| T3    | 0°30'23.57008"                              | 166°56'4.81139"  | 9943979.148                                 | 715313.142 | 71.672                    | 34.098      | 32.093 |
| X1    | 0°30'23.46334"                              | 166°56'20.69634" | 9943982.280                                 | 715804.407 | 75.636                    | 38.071      | 36.066 |
| E3    | 0°31'55.55"                                 | 166°55'24.61"    | 9941154.000                                 | 714069.000 | 43.961                    | 6.373       | 4.368  |
| S1    | 0°30'16.18"                                 | 166°56'25.046"   | 9944206.000                                 | 715939.000 | 46.391                    | 8.448       | 6.824  |
| S19   | 0°31'39.988"                                | 166°55'17.167"   | 9941632.000                                 | 713839.000 | 57.654                    | 20.058      | 18.054 |
| S21   | 0°30'23.607"                                | 166°56'4.936"    | 9943978.000                                 | 715317.000 | 71.532                    | 33.958      | 31.953 |
| S24   | 0°30'21.82"                                 | 166°56'18.1"     | 9944033.000                                 | 715724.000 | 76.309                    | 38.743      | 36.738 |

Table S2: Electrical Conductivity [ $\mu\text{S}/\text{cm}$ ] at water table (data referred to Error! Reference source not found. in the paper and S8),

| Electrical Conductivity [ $\mu\text{S}/\text{cm}$ ] at water table (data referred to Figure 10) |                  |      |       |       |      |       |       |       |       |       |      |       |
|-------------------------------------------------------------------------------------------------|------------------|------|-------|-------|------|-------|-------|-------|-------|-------|------|-------|
| Date                                                                                            | MONITORING WELLS |      |       |       |      |       |       |       |       |       |      |       |
|                                                                                                 | S1               | S2   | S3    | S4    | S5   | S6    | S7    | S8    | S9    | S10   | S11  | S12   |
| 09-Sep-2008                                                                                     | 395              | 4560 | 19100 | 10000 | 6929 | 8229  | 21200 | 10300 | 8499  | 12300 | 993  | 15900 |
| 15-Feb-2009                                                                                     | 440              | 4929 | 23000 | 7032  | 9222 | 4372  | 23100 | 5342  | 10800 | 6258  | 1349 | 18700 |
| 04-Oct-2011                                                                                     | 700              | 5480 | 25300 |       | 2135 | 3400  | 139   | 6250  | 3250  | 1950  | 1766 |       |
| 28-Apr-2013                                                                                     | 643              | 477  | 24800 |       |      | 6347  | 345   |       | 3242  | 4914  | 804  |       |
| Date                                                                                            | S14              | S15  | S16   | S17   | S18  | S19   | S20   | S21   | S22   | S23   | S24  |       |
| 09-Sep-2008                                                                                     | 3097             | 3718 | 1898  | 5081  | 644  | 8382  | 6861  | 1452  | 378   | 580   | 918  |       |
| 15-Feb-2009                                                                                     | 4514             | 2564 | 7617  | 7617  | 637  | 11400 | 8162  | 1775  | 312   | 457   | 2489 |       |
| 04-Oct-2011                                                                                     | 6325             | 5260 | 3297  | 5360  | 334  |       | 4452  | 2090  | 210   | 682   | 1150 |       |
| 28-Apr-2013                                                                                     |                  |      | 1300  | 3400  | 338  |       | 5498  | 3799  | 200   |       |      |       |
| Date                                                                                            | E1               | E2   | E3    | E4    | E5   | E6    | E7    | E8    | T1    | T2    | T3   |       |
| 09-Sep-2008                                                                                     | 3415             | 4743 | 6565  | 2954  | 6157 | 9037  | 8777  | 12500 | 10300 | 8598  | 730  |       |
| 15-Feb-2009                                                                                     | 4418             | 6045 | 10100 | 3988  | 8509 | 12500 | 9875  | 14800 | 13500 | 6688  | 1350 |       |
| 04-Oct-2011                                                                                     |                  | 7496 | 11800 | 5380  | 2174 | 639   | 15600 | 18200 | 6400  | 1200  | 1798 |       |
| 28-Apr-2013                                                                                     |                  | 4000 | 944   | 4070  | 1050 | 6800  | 6942  |       |       |       | 2301 |       |
